Microbial transition in the *Kimoto*-style starter

1  
2  
3  
4  
5  
6  
7  
8  
9  
10  
11  
12  
13  
14  
15  
16  
17  
18

**A unique case in which *Kimoto*-style fermentation was completed with**

***Leuconostoc* as the dominant genus without transitioning to *Lactobacillus***

**Authors**

Kohei Ito,<sup>1\*</sup> Ryo Niwa,<sup>1,2</sup> Yuta Yamagishi,<sup>1,3</sup> Ken Kobayashi,<sup>1</sup> Yuji Tsuchida,<sup>4</sup> Genki Hoshino,<sup>4</sup>  
Tomoyuki Nakagawa,<sup>5</sup> Takashi Watanabe<sup>6</sup>

**Affiliation**

1. BIOTA inc., Tokyo, 101-0022, Japan
2. Graduate School of Medicine, Kyoto University, Kyoto, 606-8501, Japan
3. Department of Life Science, College of Science, Rikkyo University, Tokyo, 171-8501, Japan
4. Tsuchida Sake Brewery, Gunma, 378-0102, Japan
5. Faculty of Applied Biological Sciences, Gifu University, Gifu, 501-1193, Japan
6. Gunma Industrial Technology Center, Gunma 379-2147, Japan

\* Corresponding author (e-mail: [kohei@biota.ne.jp](mailto:kohei@biota.ne.jp))

## Microbial transition in the *Kimoto*-style starter

### 19 **Abstract**

20           The *Kimoto*-style fermentation starter is a traditional preparation method of *sake*  
21 brewing. In this process, specific microbial transition patterns have been observed within  
22 nitrate-reducing bacteria and lactic acid bacteria during the production process of the  
23 fermentation starter. We have characterized phylogenetic compositions and diversity of the  
24 bacterial community in a *sake* brewery performing the *Kimoto*-style fermentation. Comparing  
25 the time-series changes with other *sake* breweries previously reported, we found a novel type  
26 of *Kimoto*-style fermentation which the microbial transition differed significantly from other  
27 breweries during the fermentation step. Specifically, the lactic acid bacteria, *Leuconostoc* spp.  
28 was a predominant species in the late stage in the preparation process of fermentation starter,  
29 on the other hand, *Lactobacillus* spp., which plays a pivotal role in other breweries, was not  
30 detected in this analysis. The discovery of this new variation of microbiome transition in  
31 *Kimoto*-style fermentation has further deepened our understanding of the diversity of *sake*  
32 brewing.

33

34 **[Keywords:** Microbiome, Japanese-*sake*, *Kimoto*-style, Lactic acid bacteria, Fermentation]

35

## Microbial transition in the *Kimoto*-style starter

36

### INTRODUCTION

37

38

39

40

41

42

43

44

45

*Sake* is a traditional alcoholic beverage made from rice in Japan. In a preliminary stage of a main brewing process, a fermentation starter with purely cultured yeast is produced to prevent microbial contamination and poor fermentation and to promote smooth alcoholic fermentation. The production process is as follows; First, *Aspergillus oryzae*, which secretes amylases, is propagated on steamed rice to make *koji*. Then, *koji*, steamed rice, and water are mixed in an open-top tank. Fermentation of this mixture produces a fermentation starter. The fermentation starter is further mixed with *koji*, steamed rice, and water, and after a 3-5 week fermentation process, the fermentation mash or starter is produced. The fermentation starter is separated into *sake* and spent rice by a filter press to complete the *sake*.

46

47

48

49

50

51

52

53

The fermentation starter is divided into three styles, *Sokujo*, *Kimoto* and *Yamahai*. *Sokujo*-style fermentation starter is a modern method to make the starter culture with the addition of food-grade lactic acid. *Kimoto*-style fermentation starter is the traditional preparation method of the starter culture and is manufactured under highly acidic conditions by inducing the growth of nitrate-reducing bacteria and lactic acid bacteria properly. *Yamahai*-style is similar to *Kimoto*-style but made without grinding rice. Lactic acid inhibits contaminations of unintended yeasts and bacteria from external environments into the fermentation starter.

54

55

56

57

58

59

60

The microbiome compositions during *Kimoto*-style fermentation starter production show standard transitions as follows. Nitrate-reducing bacteria, which were reported to come from water (1), initially grows and produces nitrite, thereby inhibiting the growth of microorganisms that are less tolerant to nitrite. At the same time, lactic acid bacteria, especially *Leuconostoc* spp., which grow at low temperatures and have fewer nutrient requirements, increase, and then lactic acid bacteria such as *Lactobacillus sakei*, which require strict nutrients, occupy the microbiome compositions as a predominant species. These steps are

## Microbial transition in the *Kimoto*-style starter

61 known as a common microbial transition in *sake* brewing (2-4).

62         However, it was reported that some fermentation starters brewed by *Kimoto*-style in  
63 several *sake* breweries show distinctive microbial transitions and chemical changes and that  
64 this is one of the reasons for producing unique *sake* flavors among breweries, even if they use  
65 the same production process (5-8). A possible reason to explain this fact is differences in  
66 *Kuratsuki* microorganisms (microorganisms living in *sake* breweries) and the introduction of  
67 diverse microorganisms from outside of tanks during the *sake* brewing process (9,10).

68         The *Tsuchida Sake* Brewery (Gunma, Japan) is one of a few breweries that produce  
69 the *Kimoto*-style fermentation starter without adding yeasts and fully relies on *Kuratsuki*  
70 microorganisms to produce the fermentation starter. In addition, compared to the *Kimoto*-style  
71 fermentation in other *sake* breweries, this *sake* brewery is characterized by not using any food  
72 additives such as brewers alcohol, enzyme reagents, or activated charcoal. Furthermore, this  
73 brewery does not use sake-brewing rice but table rice for *sake* brewing. For the above reasons,  
74 the microbial community and its transition in the fermentation starter of the brewery were  
75 considered to be divergent from previous studies.

76         In this study, we focused on the fermentation mechanism of the *Kimoto*-style  
77 fermentation starter from the *Tsuchida Sake* Brewery and analyzed its microbial community  
78 during the fermentation process in detail using its 16S rRNA amplicon sequencing. The *Kimoto*-  
79 style fermentation starter from the *Tsuchida Sake* Brewery possesses a distinctive microbial  
80 community compared with other *Kimoto*-style fermentation starters; specifically, the dominant  
81 genus of lactic acid bacteria was *Leuconostoc*, and the switch of the predominant lactic acid  
82 bacteria, from *Leuconostoc* to *Lactobacillus*, was not observed in the fermentation process of  
83 the *Kimoto*-style fermentation starter. Here we report a new profile of microbial transition in  
84 the *Kimoto*-style fermentation starter.

85

## Microbial transition in the *Kimoto*-style starter

### 86 MATERIALS AND METHODS

87 **Sample collection** Samples were collected for each day 1, 3, 5, 7, 9, 13, 17, 22, 28,  
88 and 33 after starting the fermentation of the fermentation starter. All samples were collected in  
89 duplicate and between October and November 2021. Fermentation starter samples used in this  
90 study were provided by *Tsuchida Sake* Brewing Company (Gunma, Japan). All samples were  
91 immediately frozen and stored until DNA extraction.

92  
93 **Measurement of basic chemical components** Temperatures and chemical  
94 compositions of the fermentation starter were measured. Alcohol (ALC) and Baumé degree  
95 (Be) were measured using a DA-155 vibrating density meter for alcoholic beverages (Kyoto  
96 Electronics Manufacturing Co., Ltd., Kyoto, Japan), while Acidity (TA) and Amino Acid  
97 Content (AA) were obtained using a CHA-700 multi-sample changer (Kyoto Electronics  
98 Manufacturing Co., Ltd.). The nitrite concentration was measured using a Merck Millipore  
99 MQuant nitrite test (Merck KGaA, Darmstadt, Germany).

100  
101 **Total DNA extraction and high throughput sequencing** Samples were subjected  
102 to 750ul of Lysis buffer, vortexed for 10 min and heat-treated at 100°C for 10 min, centrifuged,  
103 and the supernatant was transferred to MORA beads for automated purification on a Beckman  
104 Coulter GenFindv2 after mechanical fragmentation at a maximum speed of 3 min on an MM-  
105 400. Finally, DNA was eluted with 80ul of sterile water. 341F (5'-  
106 TCGTCGGCAGCGTCAGATGTGTATAAGAGAGACAGCCTACGGGGNGGCWGCAG-  
107 3') and 806R (5'-  
108 GTCTCGTGGGCTCGGGAGATGTGTATAAGAGACAGGACTACHVGGGGTATCTAA  
109 TCC-3') primers were utilized to amplify the V3-V4 region of the 16S rRNA gene by PCR  
110 (11,12). Thermal cycling conditions were 95 °C for 3 min; 32 cycles of 95 °C for 30 s, 55 °C

## Microbial transition in the *Kimoto*-style starter

111 for 30 s, and 72 °C for 30 s; and a final extension at 72 °C for 5 min. A second PCR was  
112 performed to add sequencing adapters and dual-index barcodes to distinguish amplicons from  
113 each sample using the same reaction conditions with eight cycles. Preparation of libraries and  
114 sequencing were performed by paired-end sequencing of 300 bp on the Illumina MiSeq  
115 platform (Illumina, Inc., San Diego USA) at GenomeRead Inc. in Kagawa, Japan.

116

117       **Microbiome analysis**     The QIIME2 (version 2021.02) (13) platform was used for  
118 microbiome analysis. FASTQ files were imported into the QIIME2 platform. Sequences were  
119 processed using qiime dada2 denoise-paired command for quality control and classification into  
120 amplicon sequencing variants (ASVs). Taxonomic analysis was run on SILVA database SSU  
121 138 by qiime feature-classifier classify-sklearn (14-16). Sequence reads that were not classified  
122 as any species after phylogenetic classification (Unassigned) and reads classified as chloroplast  
123 and mitochondria were excluded from further analyses. Since the genus *Latilactobacillus* is a  
124 taxon which relatively recently derived from the genus *Lactobacillus* (17), the SILVA database  
125 SSU 138 used in this study does not reflect the reclassification of the genus *Latilactobacillus*,  
126 so it was assigned as *Lactobacillus* in this study.

127

128       **Processing for comparative microbiome analysis**     Sequence data from BioProject  
129 PRJDB12939 was used for comparative analysis (8). Since 341F (5'-  
130 CCTACGGGGNNGCWGCAG-3') and 805R (5'-GACTACHVGGGGTATCTAATCC-3')  
131 were used in the study, removal of one base from the 5' end of the reverse read was performed  
132 to match the read lengths of the samples obtained in our study. fastp v.0.20.1 (18) was deployed  
133 for this processing. The method described above was repeated to perform taxonomic analysis.  
134 The depth of sequence reads (Features) differed among samples, and to normalize them, we  
135 subsampled from each sample to 5,000 reads each. Samples with fewer than 5,000 reads (S22,

## Microbial transition in the *Kimoto*-style starter

136 23, 24, 25, 26, 28) were excluded from the diversity analysis (Table S1). Sub-sampling is an  
137 approach for inferring microbiome differences between samples and has been reported to be a  
138 suitable analytical method when analyzing new data sets (19). To evaluate the effect of  
139 sequence read counts on microbiome diversity assessment, we examined changes in the value  
140 of the Shannon index over a range of reading counts from 0-5,000 by rarefaction curves. The  
141 Rarefaction curve of the Shannon index leveled off when the number of reads was just under  
142 500 (Table S2). Therefore, this investigation suggests that no significant changes in microbial  
143 diversity are due to the subsampling of 5,000 reads from each sample.

144

145 **Statistical Analysis** Kruskal-Wallis tests were used to compare the alpha diversity  
146 (Shannon diversity index) among samples. To compare differences in Beta diversity (Weighted  
147 UniFrac distance) between samples, for all PERMANOVA analyses, 5,000 trials were  
148 performed to assess the statistical significance. Q-values < 0.05 after multiple testing  
149 corrections were considered statistically significant. All multiple testing corrections were  
150 performed by computing FDRs using the Benjamini–Hochberg method, and Q-values (adjusted  
151 P-values) < 0.05 were considered statistically significant.

152

153

## RESULTS

154 **Chemicals and Temperature Change in fermentation starters** The chemical data  
155 and the average temperature of the *sake* starter are shown in Fig. 1. The amount of nitrite started  
156 to rise on day 7 and reached its peak on day 11. On day 14 it was undetectable; Titratable acidity  
157 (TA), a value representing total acidity, increased on day 15, followed by an increase in ethanol  
158 concentration on day 27. In addition, a rapid decrease in glucose was observed along with an  
159 increase in ethanol concentration on day 27. These changes in chemical data and the average  
160 temperature are generally observed in *Kimoto*-style fermentation, so we suggest that the

## Microbial transition in the *Kimoto*-style starter

161 fermentation proceeded well in the *Kimoto*-style fermentation starter of the *Tsuchida Sake*  
162 Brewery.

163

164 **Phylogenetic composition of the microbiome found in the fermentation starter** To  
165 track the microbial transition in the fermentation starter during the fermentation, we performed  
166 16S rRNA amplicon sequencing. Results demonstrated large changes in relative abundances of  
167 the bacterial genera (Genus) during the early to late stages (Fig. 2).

168 The genera with average relative abundances higher than 5% in the early stage (day 1  
169 to day 7) of the fermentation starters were *Methylobacterium-Methylorubrum* (23.0%),  
170 *Anaerobacillus* (16.7%), *Bacillus* (9.4%), and *Pseudomonas* (9.3%) (Table S3). The relative  
171 abundances of these bacterial genera decreased significantly within days 7-9.  
172 *Methylobacterium* spp. was reported to utilize methanol as a source of carbon and energy and  
173 is widely found on the leaf surface of plants, including rice (20,21). *Anaerobacterium* spp. is  
174 salt-tolerant and halophilic and has been found in lakes and soils in arid regions (22,23). It is  
175 reported that *Bacillus* spp. may live in *sake* breweries as *Kuratsuki* bacteria (24). *Bacillus* spp.  
176 have also been detected in *koji* and are known to be associated with the production of 4-vinyl  
177 guaiacol according to previous studies (9,25,26).

178 The bacterial genera with average relative abundances higher than 5% in the late stage  
179 (days 17-33) were *Rahnella*1 (18.1%), *Serratia* (13.9%), *Hafnia-Obesumbacterium* (8.6%), and  
180 *Carnobacterium* (6.2%) (Table S3). *Leuconostoc*, *Rahnella*, *Serratia*, *Hafnia-*  
181 *Obesumbacterium*, and *Carnobacterium* were the bacterial genera that accounted for a large  
182 proportion of the bacteria found in the late stage (days 17-33). *Leuconostoc* spp. has been  
183 detected in several fermented foods (27,28). *Serratia* spp. have been identified by previous  
184 studies from *Yamahai-moto* (6), *Rahnella* spp. from *Yamahai* (29), and Chinese sauerkraut (30).  
185 *Hafnia-Obesumbacterium* spp. has been detected in brewer's yeast along with *Rahnella* spp.,



## Microbial transition in the *Kimoto*-style starter

186 suggesting that it may produce high pH beer by inhibiting fermentation reaction (31,32).  
187 *Carnobacterium* spp. are frequently detected in the natural environment and food products,  
188 previous studies reported producing of bacteriocins in some species (33).

189

190 **Comparison with other breweries** To characterize the microbial transition in this  
191 brewery, we compared our data with a previous study that investigated the microbial transition  
192 in four *sake* breweries (8). Time-series changes in the microbial diversity (Alpha diversity;  
193 Shannon index) for each sample are shown (Table 1). *Tsuchida Sake* brewery was confirmed  
194 to have a higher microbial diversity (Shannon index) of the fermentation starters (Q-value <  
195 0.05) compared to the other breweries (Table S4).

196 A Principal Coordinate Analysis (PCoA) by Weighted UniFrac distance to visualize the  
197 differences (Beta diversity) among the microbiomes of each sample showed that the *Tsuchida*  
198 *Sake* Brewery formed a different cluster (q-value < 0.007) than the other breweries (Fig. 3 and  
199 Table S5).

200 The relative abundances of the genus *Lactobacillus* and *Leuconostoc* in each brewery  
201 during the preparation are shown in the line graphs (Fig. 4). The genus *Lactobacillus* became  
202 the dominant species in all other breweries, but the relative abundance of the genus  
203 *Lactobacillus* did not increase during the entire preparation in the *Tsuchida Sake* Brewery. On  
204 the other hand, the genus *Leuconostoc* increased in only three breweries, and in all but the  
205 *Tsuchida Sake* Brewery, their abundance eventually decreased and shifted to the genus  
206 *Lactobacillus*. In contrast, in the *Tsuchida Sake* Brewery, the genus *Leuconostoc* maintained a  
207 constant high relative abundance during the fermentation.

208

## Microbial transition in the *Kimoto*-style starter

209

### DISCUSSION

210

#### **Comparative analysis revealed unique dynamics of lactic acid bacteria in the**

211

***Tsuchida Sake Brewery*** A previous study reported three major microbial transition profiles

212

in sake brewing from the point of switches occurring in lactic acid bacteria: (1) lactic acid

213

bacteria increase overall, but *Lactobacillus* spp. remain more abundant than *Leuconostoc* spp.,

214

(2) *Lactobacillus* spp. are more abundant in the beginning, but *Leuconostoc* spp. become

215

dominant later, and (3) *Leuconostoc* spp. remain more abundant than *Lactobacillus* spp. (8).

216

Surprisingly, in the brewery we sampled, the genus *Leuconostoc* was detected as the dominant

217

species even on day 33, the last day of brewing, and only low abundances of the genus

218

*Lactobacillus* was detected throughout the entire preparation, indicating a microbial transition

219

profile differs from previous reports.

220

In addition, another study reported that *Kimoto*-style fermentation is characterized by

221

the detection of multiple lactic acid bacteria compared to *Sokujo-moto* (29), so the process of

222

*Kimoto*-style fermentation itself may contribute to the diversity of taste in different sake

223

breweries. *Sokujo-moto* is a modern type of fermentation starter which includes lactic acid to

224

maintain a low pH, thus preventing microbial contamination from the brewery (5). As indicated

225

in this study, specific microbiome transitions were observed that were different from the

226

microbial transitions reported by Takahashi *et al.*, suggesting that the microbiome is unique in

227

individual breweries and that these microbial transition factors that characterize them need to

228

be investigated (8).

229

Some studies reported that only one lactic acid bacteria appears and the transition does

230

not occur (34), and no *Lactobacillus* spp. are found (35), but to the best of my knowledge this

231

is the first study proving this trend of microbiome shift in a manner of uncultured analysis

232

method.

233

A previous study revealed that *L. sakei* has a more stringent amino acid requirement

## Microbial transition in the *Kimoto*-style starter

234 than *L. mesenteroides*, *Lactobacillus* sp., and di-tripeptides including asparagine, which is  
235 produced by *koji* mold degradation, are growth factors, and that pH and temperature affect the  
236 growth of *L. sakei* (8,36,37). In this study, the peak of nitrite concentration was relatively late  
237 at day 11, and the increase in acidity (TA; Titratable acidity) was delayed accordingly,  
238 suggesting a longer survival period of adventitious bacteria that were initially introduced (Fig.  
239 2). Therefore, there is a possibility that the growth of *L. sakei* was inhibited by specific changes  
240 in nutrients and temperature.

241 In addition, D-amino acids are attracting attention as new taste components of *sake*, D-  
242 alanine is reported to be produced by amino acid racemases from *L. mesenteroides* with low  
243 temperature (38). *Leuconostoc* spp. capable of high D-amino acid production have also been  
244 isolated (28), therefore, the presence of a high abundance of *Leuconostoc* spp. may contribute  
245 significantly to the taste of *sake*, and need to isolate and culture *Leuconostoc* spp. found in this  
246 brewery for bacterial genome sequencing and detection of unique metabolism pathways.

247

248 **Nitrate-reducing bacteria are a major factor in microbial transitions** In this study,  
249 *Pseudomonas* spp. was detected in the middle stage, and the peak of nitrite reaction was  
250 observed on the 11th day (Fig. 1). On the other hand, previous studies on *Yamahai-moto*  
251 fermentation starters, which is a sake brewing recipe similar to *Kimoto*-style and use lactic acid  
252 bacteria for maintaining the high acidity in the starter, reported cases where *Pseudomonas* spp.  
253 were not detected and no nitrite production was observed (5,39). It is considered that the genus  
254 *Pseudomonas* is easily lysed by exposure to alcohol due to its cell surface structure (40).  
255 Therefore, we believe that *Pseudomonas* spp. was detected until the middle stage, where the  
256 alcohol level rose relatively late, after day 20.

257 The structure of the microbiome changed significantly before and after the production  
258 of nitrite, suggesting that nitrate-reducing bacteria may also affect microbial transitions and

## Microbial transition in the *Kimoto*-style starter

259 other factors in the early stage (Fig. 1 and 2). This suggests that the presence or absence of  
260 nitrate-reducing bacteria such as *Pseudomonas* spp. may be one of the factors that cause  
261 differences in the microbial transitions in different breweries.

262

263         **Environmental microbiome mapping in the sake brewery** This study allowed us  
264 to detect the bacterial communities with phylogenetic composition during culturing of the  
265 fermentation starter comprehensively. In the early stage, a complex and varied microbiota is  
266 constructed as adventitious bacteria are contaminated by the built environments, tools, and raw  
267 materials used in the brewery. Since the sake brewing process is conducted in an open system,  
268 a variety of adventitious bacteria may contaminate the brewing *sake* from building  
269 environments, tools, and raw materials used in the brewery. Investigating the microbiome from  
270 architectural surfaces and tools in *sake* breweries may reveal the origin of adventitious bacteria  
271 in early sake. It has been suggested that these adventitious bacteria may affect the quality and  
272 taste of sake, so they need to be clarified (29,41). There are still many unexplained aspects of  
273 *Kuratuski* microorganisms, and we believe that this scientific elucidation of the traditional  
274 Japanese liquor will provide significant insights into food microbiology.

275

276

## 277 **Acknowledgment**

278         Samples were collected by Mr. Kota Watanabe, Mr. Keitaro Nozaki, Ms. Chinami Fujita,  
279 Ms. Aimi Kurihara, Mr. Tsutomu Watanabe, Mr. Hiroaki Igarashi, Mr. Yuki Taguchi, and Ms.  
280 Mariko Kanazawa of the *Tsuchida Sake* Brewery. Amplicon sequencing was performed by  
281 GenomeRead Inc. We thank Morgenrot Inc. for providing the computational environment for  
282 the analysis. We thank Mr. Masaomi Yanagisawa of Gunma Prefectural Technical Center for  
283 their advice. R.N. is a graduate student of Medical Innovation Program at Kyoto University and

## Microbial transition in the *Kimoto*-style starter

284 supported by JST SPRING, Grant Number JPMJSP2110.

285

### 286 **Data availability**

287       The BioSample, DRA/SRA, and BioProject accession numbers for the sequence  
288 reported here are SAMD00513369-SAMD00513388, DRR393497-DRR393516, and  
289 PRJDB13924 respectively.

290

291

Microbial transition in the *Kimoto*-style starter

292 **References**

- 293 1. **Ashizawa, T., and Saito, Y.:** Yamahai shubo ni okeru biseibutsugaku-teki kenkyu (part  
294 12) [Microbiological research on yamahai-shubo (12)], J. Brew. Soc. Jpn, **61**, 638–642.  
295 (1966) (in Japanese).
- 296 2. **Katagiri, H., and Kitahara, K.:** Studies of lactic acid bacteria isolated from seed mash  
297 (part 1), J. Agric. Chem. Soc. Jpn, **10**, 942–951. (1934) (in Japanese).
- 298 3. **Obayashi, A., and Kitahara, K.:** On the factor determining the flora of lactic acid  
299 bacteria in the starter of sake, J. Agric. Chem. Soc. Jpn, **33**, 839–843. (1959) (in Japanese).
- 300 4. **Masuda, Y., Noguchi, T., Takahashi, T., Iguchi, A., Osawa, R., and Mizoguchi, H.:**  
301 DGGE and PFGE analysis of lactic acid bacterial succession during *Kimoto* making,  
302 Seibutsu-Kogaku Kaishi, **90**, 684–690. (2012) (in Japanese).
- 303 5. **Koyanagi, T., Nakagawa, A., Kiyohara, M., Matsui, H., Tsuji, A., Barla, F., Take, H.,**  
304 **Katsuyama, Y., Tokuda, K., Nakamura, S., and other 4 authors:** Tracing microbiota  
305 changes in yamahai-moto, the traditional Japanese *sake* starter. Biosci. Biotechnol.  
306 Biochem., **80**, 399–406. (2016).
- 307 6. **Tsuji, A., Kozawa, M., Tokuda, K., Enomoto, T., Koyanagi, T.:** Robust Domination of  
308 *Lactobacillus sakei* in microbiota during traditional Japanese *sake* starter yamahai-moto  
309 fermentation and the accompanying changes in metabolites, Curr. Microbiol., **75**, 1498–  
310 1505. (2018).
- 311 7. **Nguyen, T. H. N., Wang, W.-Y., Huang, W.-L., Huang, C.-L., Chiang, T.-Y.:**  
312 Metagenomics analyses of microbial dynamics associated with putative flavor  
313 development in mash fermentation of *sake*, LWT, **163**, 113570. (2022).
- 314 8. **Takahashi, M., Morikawa, K., Kita, Y., Shimoda, T., Akao, T., Goto-Yamamoto, N.:**  
315 Changes in bacterial and chemical components and growth prediction for *Lactobacillus*  
316 *sakei* during *Kimoto*-style fermentation starter preparation in *sake* brewing: a

## Microbial transition in the *Kimoto*-style starter

- 317 comprehensive analysis. *Appl. Environ. Microbiol.*, **87**, e02546-20. (2021).
- 318 9. **Bokulich, N.A., Ohta, M., Lee, M., and Mills, D.A.:** Indigenous bacteria and fungi drive  
319 traditional kimoto *sake* fermentations. *Appl. Environ. Microbiol.*, **80**, 5522–5529. (2014).
- 320 10. **Akaike, M., Miyagawa, H., Kimura, Y., Terasaki, M., Kusaba, Y., Kitagaki, H., and**  
321 **Nishida, H.:** Chemical and bacterial components in sake and sake production process,  
322 *Curr. Microbiol.*, **77**, 632–637. (2020).
- 323 11. **Klindworth, A., Pruesse, E., Schweer, T., Peplies, J., Quast, C., Horn, M., and**  
324 **Glöckner, F.O.:** Evaluation of general 16S ribosomal RNA gene PCR primers for  
325 classical and next-generation sequencing-based diversity studies. *Nucleic Acids Res.*, **41**,  
326 e1. (2013).
- 327 12. **Caporaso, J.G., Lauber, C.L., Walters, W.A., Berg-Lyons, D., Lozupone, C.A.,**  
328 **Turnbaugh, P.J., Fierer, N., and Knight, R.:** Global patterns of 16S rRNA diversity at  
329 a depth of millions of sequences per sample. *Proc. Natl. Acad. Sci. U S A*, **108**, 4516–  
330 4522. (2011).
- 331 13. **Bolyen E, Rideout JR, Dillon MR, Bokulich NA, Abnet CC, Al-Ghalith GA,**  
332 **Alexander H, Alm EJ, Arumugam M, Asnicar F, and other 102 authors:**  
333 Reproducible, interactive, scalable and extensible microbiome data science using QIIME  
334 2, *Nat. Biotechnol.*, **37**, 852–857. (2019).
- 335 14. **Quast, C., Pruesse, E., Yilmaz, P., Gerken, J., Schweer, T., Yarza, P., Peplies, J., and**  
336 **Glöckner, F.O.:** The SILVA ribosomal RNA gene database project: improved data  
337 processing and web-based tools. *Nucleic Acids Res.*, **41**(Database issue), D590-596.  
338 (2013).
- 339 15. **Bokulich, N.A., Kaehler, B.D., Rideout, J.R., Dillon M., Bolyen, E., Knight, R.,**  
340 **Huttley, G.A., and Caporaso, J.G.:** Optimizing taxonomic classification of marker-gene  
341 amplicon sequences with QIIME 2's q2-feature-classifier plugin. *Microbiome*, **6**, 90.

## Microbial transition in the *Kimoto*-style starter

- 342 (2018).
- 343 16. **Callahan, B.J., McMurdie, P.J., Rosen, M.J., Han, A.W., Johnson, A.J., and Holmes,**  
344 **S.P.:** DADA2: High-resolution sample inference from Illumina amplicon data, *Nat.*  
345 *Methods*, **13**, 581–583. (2016).
- 346 17. **Zheng, J., Wittouck, S., Salvetti, E., Franz, C.M.A.P., Harris, H.M.B., Mattarelli, P.,**  
347 **O'Toole, P.W., Pot, B., Vandamme, P., Walter, J., and other 5 authors:** A taxonomic  
348 note on the genus *Lactobacillus*: Description of 23 novel genera, emended description of  
349 the genus *Lactobacillus*  *Beijerinck* 1901, and union of *Lactobacillaceae* and  
350 *Leuconostocaceae*, *Int. J. Syst. Evol. Microbiol.*, **70**, 2782–2858. (2020).
- 351 18. **Chen, S., Zhou, Y., Chen, Y., and Gu, J.:** Fastp: an ultra-fast all-in-one FASTQ  
352 preprocessor, *Bioinformatics*, **34**, i884–i890. (2018).
- 353 19. **Hughes, J.B., and Hellmann, J.J.:** The application of rarefaction techniques to molecular  
354 inventories of microbial diversity, *Methods Enzymol.*, **397**, 292–308. (2005).
- 355 20. **Yurimoto, H., Iguchi, H., Di Thien, D.T., Tani, A., Okumoto, Y., Ota, A., Yamauchi,**  
356 **T., Akashi, T., and Sakai, Y.:** Methanol bioeconomy: promotion of rice crop yield in  
357 paddy fields with microbial cells prepared from natural gas-derived C<sub>1</sub> compound, *Microb.*  
358 *Biotechnol.*, **14**, 1385–1396. (2021).
- 359 21. **Lai, K., Thai Nguyen N., Miwa, H., Yasuda, M., Huu Nguyen H., and Okazaki, S.:**  
360 Diversity of *Methylobacterium* spp. in the rice of the Vietnamese Mekong delta. *Microbes*  
361 *Environ.*, **35**, ME191111. (2020).
- 362 22. **Zavarzina, D.G., Tourova, T.P., Kolganova, T.V., Boulygina, E.S., and Zhilina, T.N.:**  
363 Description of *Anaerobacillus alkalilacustre* gen. nov., sp. nov.—Strictly anaerobic  
364 diazotrophic *Bacillus* isolated from soda lake and transfer of *Bacillus arseniciselenatis*,  
365 *Bacillus macyae*, and *Bacillus alkalidiazotrophicus* to *Anaerobacillus* as the new  
366 combinations *A. arseniciselenatis* comb. nov., *A. macyae* comb. nov., and *A.*



## Microbial transition in the *Kimoto*-style starter

- 367 *alkalidiazotrophicus* comb. nov. Microbiology (Moscow), **78**, 723–731. (2009).
- 368 23. **Blum, J.S., Bindi, A.B., Buzzelli, J., Stolz, J.F., and Oremland, R.S.:** *Bacillus*  
369 *arsenicoselenatis*, sp. nov., and *Bacillus selenitireducens*, sp. nov.: two haloalkaliphiles  
370 from Mono Lake, California that respire oxyanions of selenium and arsenic. Arch.  
371 Microbiol., **171**, 19–30. (1998).
- 372 24. **Kanamoto, E., Terashima, K., Shiraki, Y., and Nishida, H.:** Diversity of *Bacillus*  
373 isolates from the *sake* brewing process at a *sake* brewery, Microorganisms, **9**, 1760.  
374 (2021).
- 375 25. **Kaneoke, M.:** 4-Vinylguaiacol formation in *sake*, J. Brew. Soc. Jpn, **109**, 320–326. (2014)  
376 (in Japanese).
- 377 26. **Sun, L.H., Lv, S.W., Yu, F., Li, S.N., and He, L.Y.:** Biosynthesis of 4-vinylguaiacol  
378 from crude ferulic acid by *Bacillus licheniformis* DLF-17056. J. Biotechnol., **281**, 144–  
379 149. (2018).
- 380 27. **Endo, A.:** Diversity of lactic acid bacteria in fermented products, Jpn. J. Lactic Acid  
381 Bacteria, **22**, 87–92. (2011) (in Japanese).
- 382 28. **Kato, S., and Oikawa, T.:** Genome sequence of *Leuconostoc mesenteroides* LK-151  
383 isolated from a Japanese *sake* cellar as a high producer of D-amino acids, Genome  
384 Announc., **5**, e00661-17. (2017).
- 385 29. **Terasaki, M., Fukuyama, A., Takahashi, Y., Yamada, M., and Nishida, H.:** Bacterial  
386 DNA detected in Japanese rice wines and the fermentation starters, Curr. Microbiol., **74**,  
387 1432-1437. (2017).
- 388 30. **Zhou, Q., Zang, S., Zhao, Z., and Li, X.:** Dynamic changes of bacterial communities and  
389 nitrite character during northeastern Chinese sauerkraut fermentation. Food Sci.  
390 Biotechnol., **27**, 79–85. (2017).
- 391 31. **Vaughan, A., O'Sullivan, T., and van Sinderen, D.:** Enhancing the microbiological

## Microbial transition in the *Kimoto*-style starter

- 392 stability of malt and beer—A review, *J. Inst. Brew.*, **111**, 355–371, (2005).
- 393 32. **Ashtavinayak, P., and Elizabeth, H.A.:** Review: Gram negative bacteria in brewing.  
394 *Adv. Microbiol.*, **6**, 195–209, (2016).
- 395 33. **Leisner, J.J., Laursen, B.G., Prévost, H., Drider, D., and Dalgaard, P.:**  
396 *Carnobacterium*: positive and negative effects in the environment and in foods, *FEMS*  
397 *Microbiol. Rev.*, **31**, 592–613. (2007).
- 398 34. **Ashizawa, T.:** Yamahai shubo ni okeru biseibutsugaku-teki kenkyu (part 10)  
399 [Microbiological research on yamahai-shubo (10)], *J. Brew. Soc. Jpn*, **60**, 900–903. (1965)  
400 (in Japanese).
- 401 35. **Momose, H., and Kamao, A.:** Lactic acid cocci isolated from Moto (*sake* starter) prepared  
402 by traditional method, *J. Brew. Soc. Jpn*, **88**, 76–80. (1993) (in Japanese).
- 403 36. **Mizoguchi, H.:** Quality of *sake* characterized by lactic acid bacterial flora in traditional  
404 yeast starter (*Kimoto*), *J. Brew. Soc. Jpn*, **108**, 382–388. (2013) (in Japanese).
- 405 37. **Yamaji, E., Furukawa, K., Mizoguchi, H., and Hara, S.:** Growth factors required for  
406 the predominance of *Lactobacillus sakei* over *Leuconostoc mesenteroides* in *kimoto*, *J.*  
407 *Brew. Soc. Jpn*, **100**, 281–288. (2005) (in Japanese).
- 408 38. **Oikawa, T.:** "D-Amino acid", a new ingredient effecting on *sake* taste, *J. Brew. Soc. Jpn*,  
409 **110**, 189–197. (2015) (in Japanese).
- 410 39. **Terasaki, M., Miyagawa, S., Yamada, M., and Nishida, H.:** Detection of bacterial DNA  
411 during the process of *sake* production using sokujo-moto. *Curr. Microbiol.*, **75**, 874–879.  
412 (2018).
- 413 40. **Terasaki, M., Nishida, H.:** Bacterial DNA diversity among clear and cloudy sakes, and  
414 *sake-kasu*. *Open Bioinformatics J.*, **13**, 74–82. (2020).
- 415 41. **Nishida, H.:** *Sake* brewing and bacteria inhabiting *sake* breweries, *Front. Microbiol.*, **12**,  
416 602380. (2021).

## Microbial transition in the *Kimoto*-style starter

417

## Microbial transition in the *Kimoto*-style starter

### 418 **Figure legends**

419

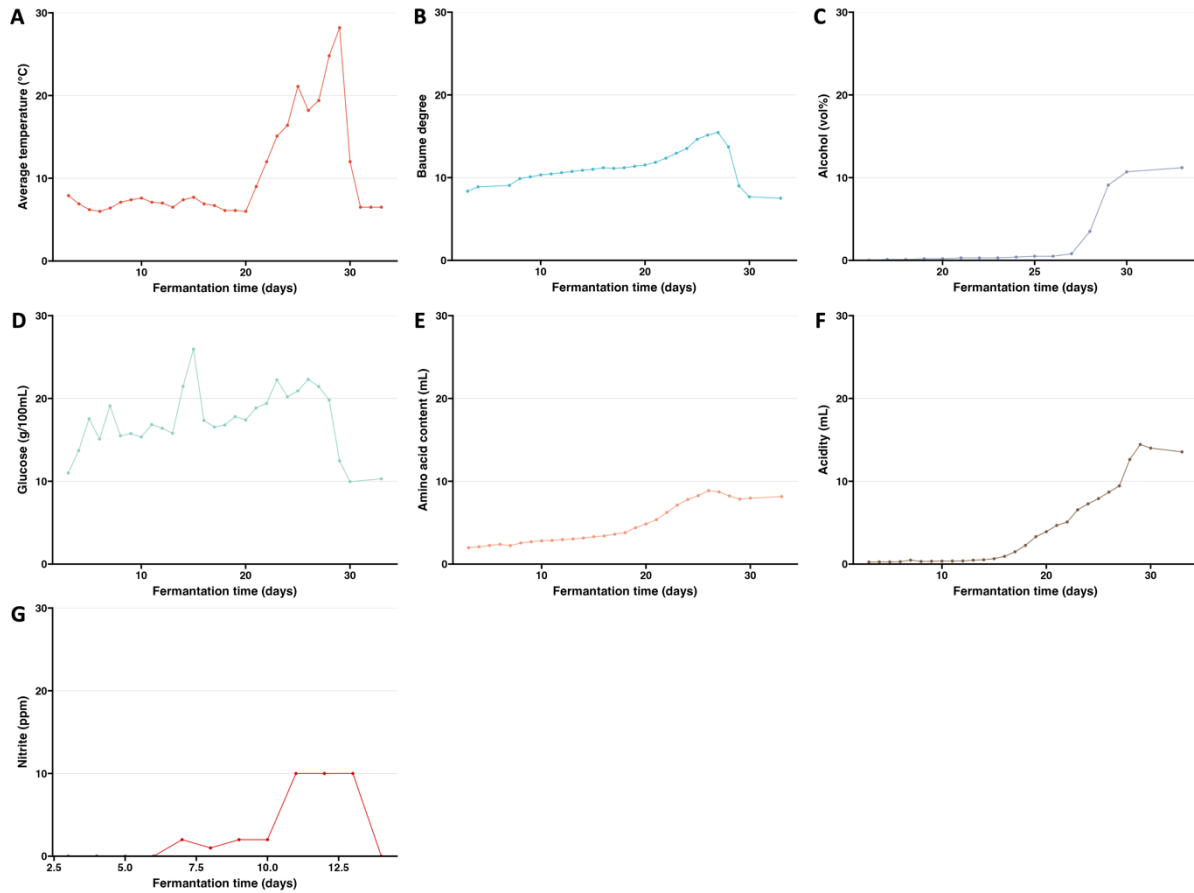

420 **FIG. 1.** Time-series data of chemical concentrations, degree, and average temperature. Average  
421 temperature (A), Baume degree (B), Alcohol (C), Glucose (D), Amino acid content (E),  
422 Acidity (F), Nitrite (G).

423

## Microbial transition in the *Kimoto*-style starter

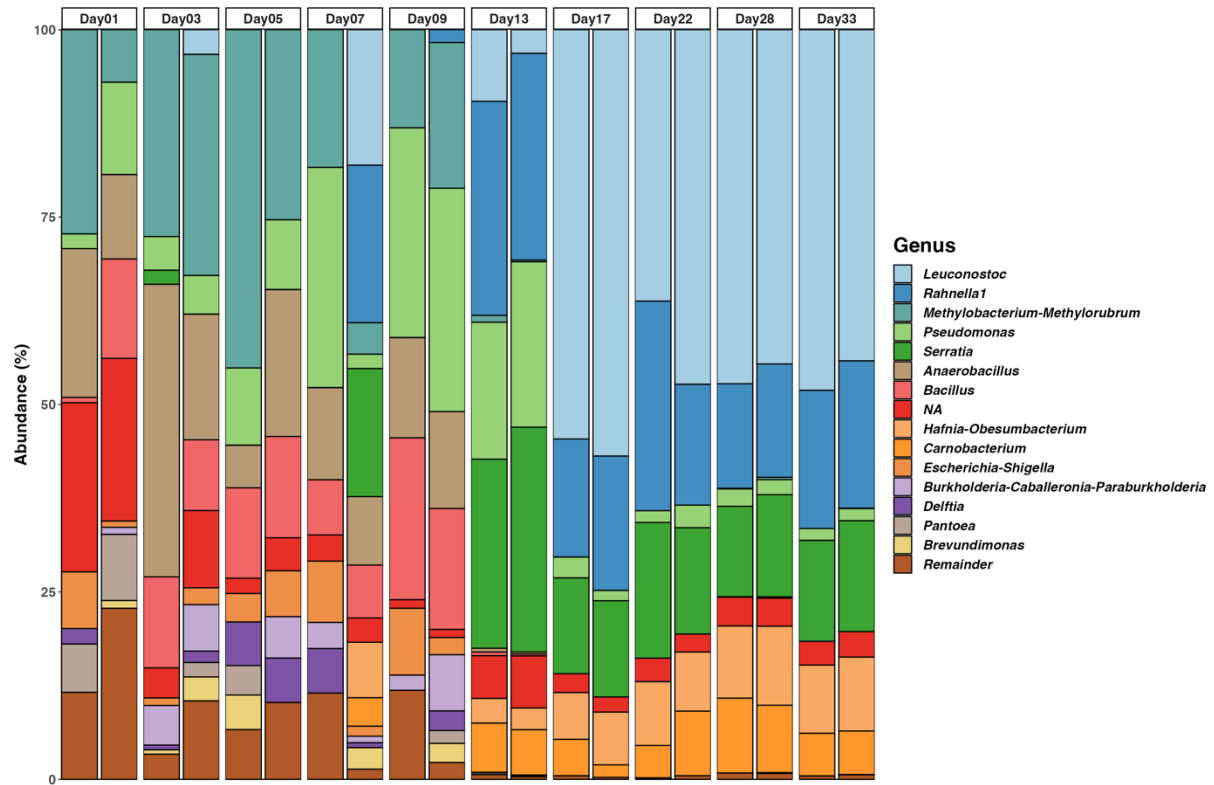

424

425 FIG. 2. Taxonomic composition of microbiomes during *Kimoto*-style fermentation starter in

426 *sake* brewing. The top 15 genera are listed, and the rest are noted as "Remainder".

427

### Microbial transition in the *Kimoto*-style starter

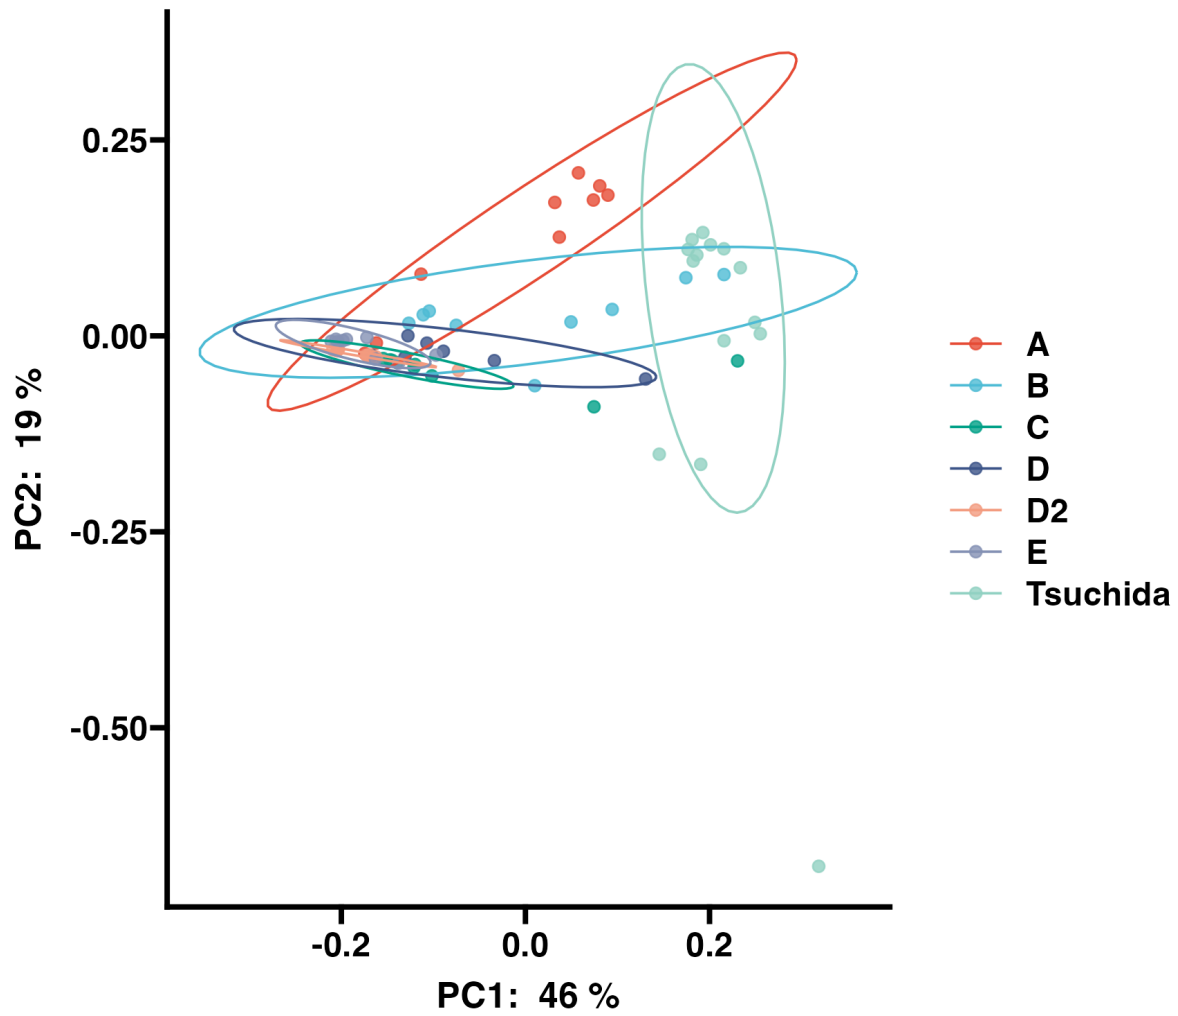

428

429 FIG. 3. Principal coordinate analysis (PCoA) of 5 *sake* breweries. Samples are compared using  
430 the weighted UniFrac distance metrics.

431

### Microbial transition in the *Kimoto*-style starter

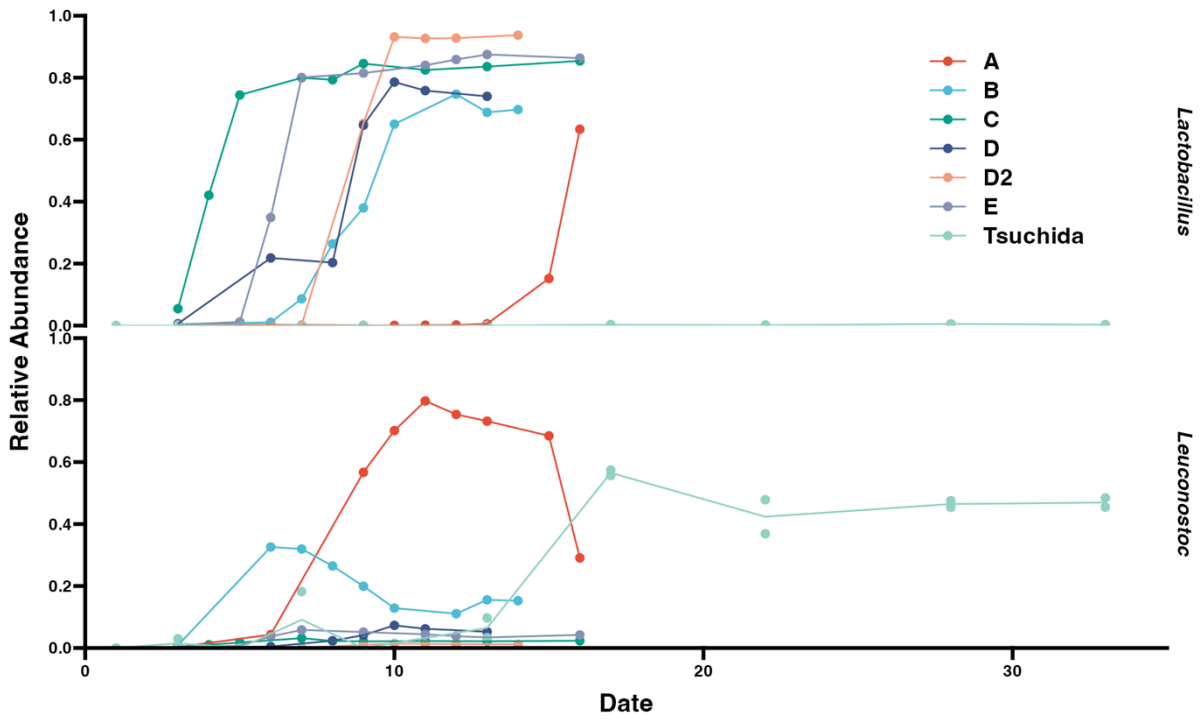

432

433 FIG. 4. Line plots of relative abundances of *Lactobacillus* and *Leuconostoc*.

434

435 -----

### 436 **Tables**

437 TABLE 1. Time-series changes in Shannon index for each sample.

## Microbial transition in the *Kimoto*-style starter

| days | sample_type | brewery  | Shannon index |
|------|-------------|----------|---------------|
| 5    | shubo       | Tsuchida | 4.083626084   |
| 7    | shubo       | Tsuchida | 4.483739465   |
| 9    | shubo       | Tsuchida | 4.00914674    |
| 9    | shubo       | Tsuchida | 3.260447879   |
| 13   | shubo       | Tsuchida | 3.955204079   |
| 13   | shubo       | Tsuchida | 3.953384193   |
| 17   | shubo       | Tsuchida | 2.683731987   |
| 17   | shubo       | Tsuchida | 2.54526448    |
| 22   | shubo       | Tsuchida | 3.246816955   |
| 22   | shubo       | Tsuchida | 2.970864866   |
| 28   | shubo       | Tsuchida | 2.966174624   |
| 28   | shubo       | Tsuchida | 3.072856664   |
| 33   | shubo       | Tsuchida | 2.925714709   |
| 33   | shubo       | Tsuchida | 3.056336844   |
| 3    | shubo       | A        | 0.075588383   |
| 6    | shubo       | A        | 0.47124225    |
| 9    | shubo       | A        | 1.748384977   |
| 10   | shubo       | A        | 1.517717158   |
| 11   | shubo       | A        | 1.252412288   |
| 12   | shubo       | A        | 1.496213641   |
| 13   | shubo       | A        | 1.682703746   |
| 15   | shubo       | A        | 1.732575907   |
| 16   | shubo       | A        | 1.486121819   |
| 3    | shubo       | B        | 2.38193983    |
| 6    | shubo       | B        | 2.933967722   |
| 7    | shubo       | B        | 3.090082101   |
| 8    | shubo       | B        | 3.294985987   |
| 9    | shubo       | B        | 3.142318413   |
| 10   | shubo       | B        | 2.2285432     |
| 12   | shubo       | B        | 1.835421019   |
| 13   | shubo       | B        | 2.113163833   |
| 14   | shubo       | B        | 2.012528982   |
| 3    | shubo       | C        | 1.837678435   |
| 4    | shubo       | C        | 2.042470055   |
| 5    | shubo       | C        | 1.28555966    |
| 7    | shubo       | C        | 1.261663511   |
| 8    | shubo       | C        | 1.221165987   |
| 9    | shubo       | C        | 1.037990141   |
| 11   | shubo       | C        | 1.10982519    |
| 13   | shubo       | C        | 1.085215814   |
| 16   | shubo       | C        | 1.016089562   |
| 3    | shubo       | D        | 1.812960613   |
| 6    | shubo       | D        | 2.714883385   |
| 8    | shubo       | D        | 3.393236556   |
| 9    | shubo       | D        | 2.492923589   |
| 10   | shubo       | D        | 2.097860823   |
| 11   | shubo       | D        | 2.214411678   |
| 13   | shubo       | D        | 2.233278552   |
| 3    | shubo       | D2       | 0.541406715   |
| 5    | shubo       | D2       | 0.55204851    |
| 6    | shubo       | D2       | 0.460579254   |
| 7    | shubo       | D2       | 0.725185898   |
| 9    | shubo       | D2       | 2.65814023    |
| 10   | shubo       | D2       | 1.727365975   |
| 11   | shubo       | D2       | 1.722444728   |
| 12   | shubo       | D2       | 1.675929835   |
| 14   | shubo       | D2       | 1.64604447    |
| 3    | shubo       | E        | 0.806481485   |
| 5    | shubo       | E        | 1.332881408   |
| 6    | shubo       | E        | 2.553896711   |
| 7    | shubo       | E        | 1.644847183   |
| 9    | shubo       | E        | 1.56711282    |
| 11   | shubo       | E        | 1.427864233   |
| 12   | shubo       | E        | 1.328343618   |
| 13   | shubo       | E        | 1.247446865   |
| 16   | shubo       | E        | 1.325637366   |
